# Supplementary material for: Differential Sensitivity of Src-Family Kinases to Activation by SH3 Domain Displacement
Source: PubMed Central journal article supplement (PMC4140816; doi:10.1371/journal.pone.0105629), 2014-08-21
Supplement: pone.0105629.s001.pdf [file pone.0105629.s001.pdf]

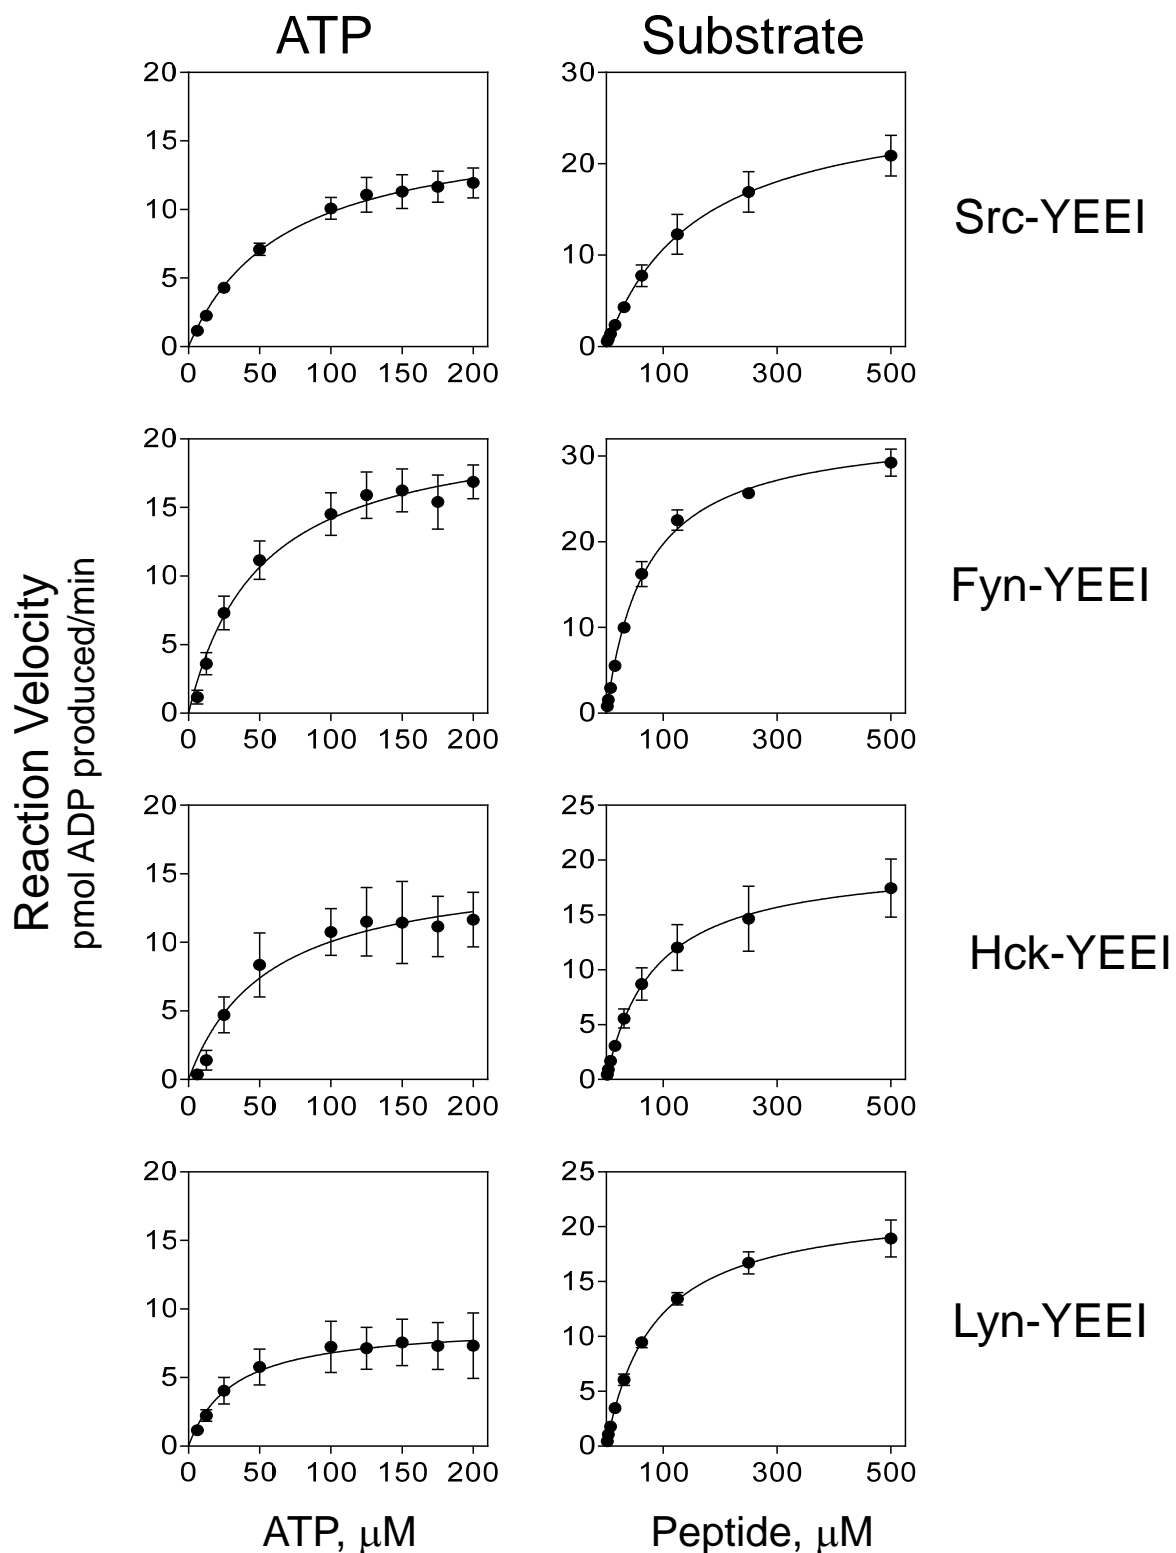

**Figure S1.** Recombinant near-full-length Src-family kinases obey Michaelis-Menten kinetics. Initial reaction velocities for each of the SFK-YEEI proteins shown were determined over a range of ATP and peptide substrate (sequence YIYGSFK) concentrations as described under Materials and Methods. Plots of reaction velocity vs. the concentration of ATP (*left panels*) and substrate (*right panels*) exhibited saturation kinetics and were fit to the Michaelis-Menten equation by non-linear regression analysis (GraphPad Prism Software). The resulting  $K_m$  and  $V_{max}$  values are presented in Table 2 in the main text.
